# Supplementary material
Source: PubMed Central journal article supplement (PMC9933617)
Supplement: flgastro-2022-102113supp001.pdf [file flgastro-2022-102113supp001.pdf]

**Supplementary Table 1: ICD9 and ICD10 Codes**

| Variables                    | ICD9  | ICD10   |         |         |        |
|------------------------------|-------|---------|---------|---------|--------|
|                              | Code  | Code    |         |         |        |
| <b>Medical Comorbidities</b> |       |         |         |         |        |
| <b>Diabetes</b>              |       |         |         |         |        |
|                              | 25000 | E11     | E113312 | E113529 | E1140  |
|                              | 25002 | E110    | E113313 | E11353  | E1141  |
|                              | 25010 | E1100   | E113319 | E113531 | E1142  |
|                              | 25012 | E1101   | E11339  | E113532 | E1143  |
|                              | 25020 | E111    | E113391 | E113533 | E1144  |
|                              | 25022 | E1110   | E113392 | E113539 | E1149  |
|                              | 25030 | E1111   | E113393 | E11354  | E115   |
|                              | 25032 | E112    | E113399 | E113541 | E1151  |
|                              | 25040 | E1121   | E1134   | E113542 | E1152  |
|                              | 25042 | E1122   | E11341  | E113543 | E1159  |
|                              | 25050 | E1129   | E113411 | E113549 | E116   |
|                              | 25052 | E113    | E113412 | E11355  | E1161  |
|                              | 25060 | E1131   | E113413 | E113551 | E11610 |
|                              | 25062 | E11311  | E113419 | E113552 | E11618 |
|                              | 25070 | E11319  | E11349  | E113553 | E1162  |
|                              | 25072 | E1132   | E113491 | E113559 | E11620 |
|                              | 25080 | E11321  | E113492 | E11359  | E11621 |
|                              | 25082 | E113211 | E113493 | E113591 | E11622 |
|                              | 25090 | E113212 | E113499 | E113592 | E11628 |
|                              | 25092 | E113213 | E1135   | E113593 | E1163  |
|                              |       | E113219 | E11351  | E113599 | E11630 |
|                              |       | E11329  | E113511 | E1136   | E11638 |
|                              |       | E113291 | E113512 | E1137   | E1164  |
|                              |       | E113292 | E113513 | E1137X1 | E11641 |
|                              |       | E113293 | E113519 | E1137X2 | E11649 |
|                              |       | E113299 | E11352  | E1137X3 | E1165  |
|                              |       | E1133   | E113521 | E1137X9 | E1169  |
|                              |       | E11331  | E113522 | E1139   | E118   |
|                              |       | E113311 | E113523 | E114    | E119   |
| <b>Hyperlipidemia</b>        |       |         |         |         |        |
|                              | 2722  | E782    | E780    | E781    |        |
|                              | 2720  | E784    | E7800   |         |        |

| 2721                                         | E785   | E7801  |        |        |
|----------------------------------------------|--------|--------|--------|--------|
| <b>Hypertension</b>                          |        |        |        |        |
| 4010                                         | I10    |        |        |        |
| 4011                                         |        |        |        |        |
| 4019                                         |        |        |        |        |
| <b>Chronic Obstructive Pulmonary Disease</b> |        |        |        |        |
| 4910                                         | J41    | J439   |        |        |
| 4911                                         | J410   | J47    |        |        |
| 49120                                        | J411   | J470   |        |        |
| 49121                                        | J418   | J471   |        |        |
| 49122                                        | J42    | J479   |        |        |
| 4918                                         | J440   | J44    |        |        |
| 4919                                         | J441   |        |        |        |
| 4928                                         | J449   |        |        |        |
| 5181                                         | J43    |        |        |        |
| 5182                                         | J430   |        |        |        |
| 4940                                         | J431   |        |        |        |
| 4941                                         | J432   |        |        |        |
| 496                                          | J438   |        |        |        |
| <b>Coronary Artery Disease</b>               |        |        |        |        |
| 41400                                        | I251   | I25709 | I25730 | I25768 |
| 41401                                        | I2510  | I2571  | I25731 | I25769 |
| 41402                                        | I2511  | I25710 | I25738 | I2579  |
| 41403                                        | I25110 | I25711 | I25739 | I25790 |
| 41404                                        | I25111 | I25718 | I2575  | I25791 |
| 41405                                        | I25118 | I25719 | I25750 | I25798 |
| 41406                                        | I25119 | I2572  | I25751 | I25799 |
| 41407                                        | I257   | I25720 | I25758 | I2581  |
| 4143                                         | I2570  | I25721 | I25759 | I25810 |
| 4144                                         | I25700 | I25728 | I2576  | I25811 |
|                                              | I25701 | I25729 | I25760 | I25812 |
|                                              | I25708 | I2573  | I25761 | I2583  |
|                                              |        |        |        | I2584  |
| <b>Chronic Kidney Disease</b>                |        |        |        |        |
| 5851                                         | N18    | N189   |        |        |
| 5852                                         | N181   |        |        |        |
| 5853                                         | N182   |        |        |        |
| 5854                                         | N183   |        |        |        |
| 5855                                         | N184   |        |        |        |
| 5856                                         | N185   |        |        |        |

| 5859                            | N186   |        |         |         |
|---------------------------------|--------|--------|---------|---------|
| <b>Congestive Heart Failure</b> |        |        |         |         |
| 39891                           | I110   | I5081  |         |         |
| 40201                           | I130   | I50810 |         |         |
| 40211                           | I132   | I50811 |         |         |
| 40291                           | I50    | I50812 |         |         |
| 40401                           | I501   | I50813 |         |         |
| 40403                           | I502   | I50814 |         |         |
| 4280                            | I5020  | I5082  |         |         |
| 4281                            | I5021  | I5083  |         |         |
| 42820                           | I5022  | I5084  |         |         |
| 42821                           | I5023  | I5089  |         |         |
| 42822                           | I503   | I509   |         |         |
| 42823                           | I5030  |        |         |         |
| 42830                           | I5031  |        |         |         |
| 42831                           | I5032  |        |         |         |
| 42832                           | I5033  |        |         |         |
| 42833                           | I504   |        |         |         |
| 42840                           | I5040  |        |         |         |
| 42841                           | I5041  |        |         |         |
| 42842                           | I5042  |        |         |         |
| 42843                           | I5043  |        |         |         |
| 4289                            | I508   |        |         |         |
| <b>Coagulopathy</b>             |        |        |         |         |
| 2869                            | D688   | D689   |         |         |
| <b>Alcohol Use Disorder</b>     |        |        |         |         |
| 30300                           | F10    | F1018  | F10229  | F1095   |
| 30301                           | F101   | F10180 | F1023   | F10950  |
| 30302                           | F1010  | F10181 | F10230  | F10951  |
| 30390                           | F1012  | F10182 | F10231  | F10959  |
| 30391                           | F10121 | F10188 | F10232  | F1096   |
| 30392                           | F10129 | F1019  | F10239  | F1097   |
| 30500                           | F1014  | F102   | F109    | F1098   |
| 30501                           | F1015  | F1020  | F1092   | F10980  |
| 30502                           | F10150 | F1022  | F10921  | F10981  |
| 30503                           | F10151 | F10220 | F10929  | F10982  |
|                                 | F10159 | F10221 | F1094   | F10988  |
|                                 |        |        |         | F1099   |
| <b>Cigarette Use</b>            |        |        |         |         |
| 3051                            | F17200 | T65211 | T65221A | T65291D |

|                          |        |         |         |         |
|--------------------------|--------|---------|---------|---------|
| 98984                    | F17201 | T65211A | T65221D | T65291S |
| V1582                    | F17210 | T65211D | T65221S | T65292  |
|                          | F17211 | T65211S | T65222  | T65292A |
|                          | F1722  | T65212  | T65222A | T65292D |
|                          | F17220 | T65212A | T65222D | T65292S |
|                          | F17221 | T65212D | T65222S | T65293  |
|                          | F17223 | T65212S | T65223  | T65293A |
|                          | F17228 | T65213  | T65223A | T65293D |
|                          | F17229 | T65213A | T65223D | T65293S |
|                          | F1729  | T65213D | T65223S | T65294  |
|                          | F17290 | T65213S | T65224  | T65294A |
|                          | F17291 | T65214  | T65224A | T65294D |
|                          | F17293 | T65214A | T65224D | T65294S |
|                          | F17298 | T65214D | T65224S | Z720    |
|                          | F17299 | T65214S | T6529   | Z87891  |
|                          | T652   | T6522   | T65291  |         |
|                          | T6521  | T65221  | T65291A |         |
| <hr/>                    |        |         |         |         |
| Obesity                  |        |         |         |         |
| 27800                    | E66    | E6601   | E661    | E668    |
| 27801                    | E660   | E6609   | E662    | E669    |
| <hr/>                    |        |         |         |         |
| Liver Etiologies         |        |         |         |         |
| Cirrhosis                |        |         |         |         |
| 5712                     | K7460  | K7030   |         |         |
| 5715                     | K7469  | K7031   |         |         |
| <hr/>                    |        |         |         |         |
| Hepatocellular Carcinoma |        |         |         |         |
| 1550                     | C220   |         |         |         |
| <hr/>                    |        |         |         |         |
| Cholangiocarcinoma       |        |         |         |         |
| 1551                     | C221   |         |         |         |
| <hr/>                    |        |         |         |         |
| Alcoholic Liver Disease  |        |         |         |         |
| 5710                     | K70    | K702    | K7040   |         |
| 5711                     | K700   | K703    | K7041   |         |
| 5712                     | K701   | K7030   | K709    |         |
| 5713                     | K7010  | K7031   |         |         |
| 5718                     | K7011  | K704    |         |         |
| <hr/>                    |        |         |         |         |
| Hepatitis B*             |        |         |         |         |
| 7022                     | B180   |         |         |         |
| 7023                     | B181   |         |         |         |

|                                           |       |       |       |
|-------------------------------------------|-------|-------|-------|
|                                           | 7032  |       |       |
|                                           | 7033  |       |       |
| <b>Hepatitis C†</b>                       |       |       |       |
|                                           | 7044  | B182  |       |
|                                           | 7054  |       |       |
| <b>Non-Alcoholic Fatty Liver Disease‡</b> |       |       |       |
|                                           | 5718  | K7581 | K760  |
| <b>Nutrition</b>                          |       |       |       |
| <b>Malnutrition</b>                       |       |       |       |
|                                           | 262   | E43   |       |
|                                           | 2630  | E44   |       |
|                                           | 2631  | E440  |       |
|                                           | 2638  | E441  |       |
|                                           | 2639  | E46   |       |
| <b>Liver Complications</b>                |       |       |       |
| <b>Ascites</b>                            |       |       |       |
|                                           | 78959 | R188  |       |
| <b>Varices</b>                            |       |       |       |
|                                           | 4560  | I8501 |       |
|                                           | 45620 | I8511 |       |
|                                           | 4561  | I8500 |       |
|                                           | 45621 | I8510 |       |
| <b>Sepsis</b>                             |       |       |       |
|                                           | 31    | A021  | A4153 |
|                                           | 223   | A227  | A4159 |
|                                           | 380   | A40   | A418  |
|                                           | 3810  | A400  | A4181 |
|                                           | 3811  | A401  | A4189 |
|                                           | 3812  | A403  | A419  |
|                                           | 3819  | A408  | A427  |
|                                           | 382   | A409  | A5486 |
|                                           | 383   | A41   | R652  |
|                                           | 3840  | A410  | R6520 |
|                                           | 3841  | A4101 | R6521 |
|                                           | 3842  | A4102 |       |
|                                           | 3843  | A411  |       |
|                                           | 3844  | A412  |       |
|                                           | 3849  | A413  |       |

|                                   |       |       |      |  |
|-----------------------------------|-------|-------|------|--|
| 388                               | A414  |       |      |  |
| 389                               | A415  |       |      |  |
| 78552                             | A4150 |       |      |  |
| 99591                             | A4151 |       |      |  |
| 99592                             | A4152 |       |      |  |
| <hr/>                             |       |       |      |  |
| Variceal Bleeding                 |       |       |      |  |
| 4560                              | I8501 |       |      |  |
| 45620                             | I8511 |       |      |  |
| <hr/>                             |       |       |      |  |
| Spontaneous Bacterial Peritonitis |       |       |      |  |
| 56723                             | K652  |       |      |  |
| <hr/>                             |       |       |      |  |
| Hepatorenal Syndrome              |       |       |      |  |
| 5724                              | K767  |       |      |  |
| <hr/>                             |       |       |      |  |
| Hepatic Encephalopathy            |       |       |      |  |
| 5722                              | K7290 |       |      |  |
| <hr/>                             |       |       |      |  |
| Acute Liver Failure               |       |       |      |  |
| 570                               | K7200 | K7201 | K762 |  |
| <hr/>                             |       |       |      |  |
| *Chronic Hepatitis B Only         |       |       |      |  |
| †Chronic Hepatitis C Only         |       |       |      |  |
| ‡Nonalcoholic Fatty Liver         |       |       |      |  |
