# Supplementary material
Source: PubMed Central journal article supplement (PMC9933617)
Supplement: flgastro-2022-102113supp002.pdf [file flgastro-2022-102113supp002.pdf]

Supplementary Table 2a: Comparison of Socioeconomic Factors and Hospital Characteristics in Patients Admitted with Autoimmune Hepatitis; Male versus Female

| Category                          | Pre-Match Comparison |         |          |         |             | Post-Match Comparison |         |          |         |             |
|-----------------------------------|----------------------|---------|----------|---------|-------------|-----------------------|---------|----------|---------|-------------|
|                                   | Female               |         | Male     |         | p-value     | Female                |         | Male     |         | p-value     |
|                                   | n = 17178            | 78.85 % | n = 4609 | 21.15 % |             | n = 4609              | 50.00 % | n = 4609 | 50.00 % |             |
| Median Household Income           |                      |         |          |         | < 0.001 *** |                       |         |          |         | 0.24        |
| Quartile 1 (%)                    | 5022                 | 29.20 % | 1205     | 26.10 % |             | 1240                  | 26.90 % | 1205     | 26.10 % |             |
| Quartile 2 (%)                    | 4474                 | 26.00 % | 1173     | 25.50 % |             | 1229                  | 26.70 % | 1173     | 25.50 % |             |
| Quartile 3 (%)                    | 4125                 | 24.00 % | 1166     | 25.30 % |             | 1142                  | 24.80 % | 1166     | 25.30 % |             |
| Quartile 4 (%)                    | 3557                 | 20.70 % | 1065     | 23.10 % |             | 998                   | 21.70 % | 1065     | 23.10 % |             |
| Hospital Bed Size                 |                      |         |          |         | 0.002 **    |                       |         |          |         | 0.66        |
| Small (%)                         | 2495                 | 14.50 % | 599      | 13.00 % |             | 602                   | 13.10 % | 599      | 13.00 % |             |
| Medium (%)                        | 4367                 | 25.40 % | 1115     | 24.20 % |             | 1151                  | 25.00 % | 1115     | 24.20 % |             |
| Large (%)                         | 10316                | 60.10 % | 2895     | 62.80 % |             | 2856                  | 62.00 % | 2895     | 62.80 % |             |
| Hospital Location/Teaching Status |                      |         |          |         | < 0.001 *** |                       |         |          |         | < 0.001 *** |
| Rural (%)                         | 1175                 | 6.84 %  | 333      | 7.22 %  |             | 343                   | 7.44 %  | 333      | 7.22 %  |             |
| Urban Nonteaching (%)             | 3991                 | 23.20 % | 903      | 19.60 % |             | 1169                  | 25.40 % | 903      | 19.60 % |             |
| Urban teaching (%)                | 12012                | 69.90 % | 3373     | 73.20 % |             | 3097                  | 67.20 % | 3373     | 73.20 % |             |
| Hospital Region                   |                      |         |          |         | 0.61        |                       |         |          |         | < 0.001 *** |
| Northeast (%)                     | 3208                 | 18.70 % | 879      | 19.10 % |             | 1004                  | 21.80 % | 879      | 19.10 % |             |
| Midwest (%)                       | 4076                 | 23.70 % | 1116     | 24.20 % |             | 1176                  | 25.50 % | 1116     | 24.20 % |             |
| South (%)                         | 6780                 | 39.50 % | 1769     | 38.40 % |             | 1694                  | 36.80 % | 1769     | 38.40 % |             |
| West (%)                          | 3114                 | 18.10 % | 845      | 18.30 % |             | 735                   | 15.90 % | 845      | 18.30 % |             |
| Insurance Type                    |                      |         |          |         | < 0.001 *** |                       |         |          |         | < 0.001 *** |
| Medicare (%)                      | 8892                 | 51.80 % | 2006     | 43.50 % |             | 2107                  | 45.70 % | 2006     | 43.50 % |             |
| Medicaid (%)                      | 2378                 | 13.80 % | 628      | 13.60 % |             | 712                   | 15.40 % | 628      | 13.60 % |             |
| Private Insurance (%)             | 4983                 | 29.00 % | 1634     | 35.50 % |             | 1481                  | 32.10 % | 1634     | 35.50 % |             |
| Self-Pay (%)                      | 505                  | 2.94 %  | 176      | 3.82 %  |             | 170                   | 3.69 %  | 176      | 3.82 %  |             |
| No Charge (%)                     | 74                   | 0.43 %  | 14       | 0.30 %  |             | 24                    | 0.52 %  | 14       | 0.30 %  |             |
| Other (%)                         | 346                  | 2.01 %  | 151      | 3.28 %  |             | 115                   | 2.50 %  | 151      | 3.28 %  |             |

Supplementary Table 2b: Comparison of Socioeconomic Factors and Hospital Characteristics in Patients Admitted with Autoimmune Hepatitis; Stratified by Race

| Category                          | Black vs White Pre-Match Comparison |         |           |         |             | Black vs White Post-Match Comparison |         |          |         |             |
|-----------------------------------|-------------------------------------|---------|-----------|---------|-------------|--------------------------------------|---------|----------|---------|-------------|
|                                   | Black                               |         | White     |         | p-value     | Black                                |         | White    |         | p-value     |
|                                   | n = 3688                            | 19.81 % | n = 14926 | 80.19 % |             | n = 3688                             | 50.00 % | n = 3688 | 50.00 % |             |
| Median Household Income           |                                     |         |           |         | < 0.001 *** |                                      |         |          |         | < 0.001 *** |
| Quartile 1 (%)                    | 1764                                | 47.80 % | 3252      | 21.80 % |             | 1764                                 | 47.80 % | 861      | 23.30 % |             |
| Quartile 2 (%)                    | 811                                 | 22.00 % | 3989      | 26.70 % |             | 811                                  | 22.00 % | 975      | 26.40 % |             |
| Quartile 3 (%)                    | 612                                 | 16.60 % | 3979      | 26.70 % |             | 612                                  | 16.60 % | 979      | 26.50 % |             |
| Quartile 4 (%)                    | 501                                 | 13.60 % | 3706      | 24.80 % |             | 501                                  | 13.60 % | 873      | 23.70 % |             |
| Hospital Bed Size                 |                                     |         |           |         | < 0.001 *** |                                      |         |          |         | 0.005 **    |
| Small (%)                         | 421                                 | 11.40 % | 2258      | 15.10 % |             | 421                                  | 11.40 % | 494      | 13.40 % |             |
| Medium (%)                        | 884                                 | 24.00 % | 3871      | 25.90 % |             | 884                                  | 24.00 % | 934      | 25.30 % |             |
| Large (%)                         | 2383                                | 64.60 % | 8797      | 58.90 % |             | 2383                                 | 64.60 % | 2260     | 61.30 % |             |
| Hospital Location/Teaching Status |                                     |         |           |         | < 0.001 *** |                                      |         |          |         | < 0.001 *** |
| Rural (%)                         | 115                                 | 3.12 %  | 1304      | 8.74 %  |             | 115                                  | 3.12 %  | 322      | 8.73 %  |             |
| Urban Nonteaching (%)             | 572                                 | 15.50 % | 3731      | 25.00 % |             | 572                                  | 15.50 % | 948      | 25.70 % |             |
| Urban teaching (%)                | 3001                                | 81.40 % | 9891      | 66.30 % |             | 3001                                 | 81.40 % | 2418     | 65.60 % |             |
| Hospital Region                   |                                     |         |           |         | < 0.001 *** |                                      |         |          |         | < 0.001 *** |
| Northeast (%)                     | 616                                 | 16.70 % | 2920      | 19.60 % |             | 616                                  | 16.70 % | 797      | 21.60 % |             |
| Midwest (%)                       | 876                                 | 23.80 % | 3996      | 26.80 % |             | 876                                  | 23.80 % | 1030     | 27.90 % |             |
| South (%)                         | 1891                                | 51.30 % | 5531      | 37.10 % |             | 1891                                 | 51.30 % | 1376     | 37.30 % |             |
| West (%)                          | 305                                 | 8.27 %  | 2479      | 16.60 % |             | 305                                  | 8.27 %  | 485      | 13.20 % |             |
| Insurance Type                    |                                     |         |           |         | < 0.001 *** |                                      |         |          |         | < 0.001 *** |
| Medicare (%)                      | 1453                                | 39.40 % | 8232      | 55.20 % |             | 1453                                 | 39.40 % | 1437     | 39.00 % |             |
| Medicaid (%)                      | 868                                 | 23.50 % | 1289      | 8.64 %  |             | 868                                  | 23.50 % | 543      | 14.70 % |             |
| Private Insurance (%)             | 1090                                | 29.60 % | 4721      | 31.60 % |             | 1090                                 | 29.60 % | 1463     | 39.70 % |             |
| Self-Pay (%)                      | 159                                 | 4.31 %  | 327       | 2.19 %  |             | 159                                  | 4.31 %  | 124      | 3.36 %  |             |
| No Charge (%)                     | 34                                  | 0.92 %  | 25        | 0.17 %  |             | 34                                   | 0.92 %  | 13       | 0.35 %  |             |
| Other (%)                         | 84                                  | 2.28 %  | 332       | 2.22 %  |             | 84                                   | 2.28 %  | 108      | 2.93 %  |             |

  

| Category                          | Hispanic vs White Pre-Match Comparison |         |           |         |             | Hispanic vs White Post-Match Comparison |         |          |         |             |
|-----------------------------------|----------------------------------------|---------|-----------|---------|-------------|-----------------------------------------|---------|----------|---------|-------------|
|                                   | Hispanic                               |         | White     |         | p-value     | Hispanic                                |         | White    |         | p-value     |
|                                   | n = 3173                               | 17.53 % | n = 14926 | 82.47 % |             | n = 3173                                | 50.00 % | n = 3173 | 50.00 % |             |
| Median Household Income           |                                        |         |           |         | < 0.001 *** |                                         |         |          |         | < 0.001 *** |
| Quartile 1 (%)                    | 1211                                   | 38.20 % | 3252      | 21.80 % |             | 1211                                    | 38.20 % | 677      | 21.30 % |             |
| Quartile 2 (%)                    | 847                                    | 26.70 % | 3989      | 26.70 % |             | 847                                     | 26.70 % | 861      | 27.10 % |             |
| Quartile 3 (%)                    | 700                                    | 22.10 % | 3979      | 26.70 % |             | 700                                     | 22.10 % | 843      | 26.60 % |             |
| Quartile 4 (%)                    | 415                                    | 13.10 % | 3706      | 24.80 % |             | 415                                     | 13.10 % | 792      | 25.00 % |             |
| Hospital Bed Size                 |                                        |         |           |         | < 0.001 *** |                                         |         |          |         | 0.20        |
| Small (%)                         | 415                                    | 13.10 % | 2258      | 15.10 % |             | 415                                     | 13.10 % | 437      | 13.80 % |             |
| Medium (%)                        | 727                                    | 22.90 % | 3871      | 25.90 % |             | 727                                     | 22.90 % | 774      | 24.40 % |             |
| Large (%)                         | 2031                                   | 64.00 % | 8797      | 58.90 % |             | 2031                                    | 64.00 % | 1962     | 61.80 % |             |
| Hospital Location/Teaching Status |                                        |         |           |         | < 0.001 *** |                                         |         |          |         | < 0.001 *** |
| Rural (%)                         | 89                                     | 2.80 %  | 1304      | 8.74 %  |             | 89                                      | 2.80 %  | 256      | 8.07 %  |             |
| Urban Nonteaching (%)             | 591                                    | 18.60 % | 3731      | 25.00 % |             | 591                                     | 18.60 % | 847      | 26.70 % |             |
| Urban teaching (%)                | 2493                                   | 78.60 % | 9891      | 66.30 % |             | 2493                                    | 78.60 % | 2070     | 65.20 % |             |
| Hospital Region                   |                                        |         |           |         | < 0.001 *** |                                         |         |          |         | < 0.001 *** |
| Northeast (%)                     | 551                                    | 17.40 % | 2920      | 19.60 % |             | 551                                     | 17.40 % | 730      | 23.00 % |             |
| Midwest (%)                       | 320                                    | 10.10 % | 3996      | 26.80 % |             | 320                                     | 10.10 % | 867      | 27.30 % |             |
| South (%)                         | 1127                                   | 35.50 % | 5531      | 37.10 % |             | 1127                                    | 35.50 % | 1142     | 36.00 % |             |
| West (%)                          | 1175                                   | 37.00 % | 2479      | 16.60 % |             | 1175                                    | 37.00 % | 434      | 13.70 % |             |
| Insurance Type                    |                                        |         |           |         | < 0.001 *** |                                         |         |          |         | < 0.001 *** |
| Medicare (%)                      | 1213                                   | 38.20 % | 8232      | 55.20 % |             | 1213                                    | 38.20 % | 1356     | 42.70 % |             |
| Medicaid (%)                      | 849                                    | 26.80 % | 1289      | 8.64 %  |             | 849                                     | 26.80 % | 353      | 11.10 % |             |
| Private Insurance (%)             | 806                                    | 25.40 % | 4721      | 31.60 % |             | 806                                     | 25.40 % | 1256     | 39.60 % |             |
| Self-Pay (%)                      | 195                                    | 6.15 %  | 327       | 2.19 %  |             | 195                                     | 6.15 %  | 113      | 3.56 %  |             |
| No Charge (%)                     | 29                                     | 0.91 %  | 25        | 0.17 %  |             | 29                                      | 0.91 %  | 9        | 0.28 %  |             |
| Other (%)                         | 81                                     | 2.55 %  | 332       | 2.22 %  |             | 81                                      | 2.55 %  | 86       | 2.71 %  |             |
