# Supplementary material
Source: PubMed Central journal article supplement (PMC9933617)
Supplement: flgastro-2022-102113supp003.pdf [file flgastro-2022-102113supp003.pdf]

Supplementary Table 3a: Pre-Match Comparison of Hospital Outcomes in Patients Admitted with Autoimmune Hepatitis; Male versus Female

| Hospital Outcomes                       | Female    |             | Male     |             | p-value | Univariate Analysis |                    |
|-----------------------------------------|-----------|-------------|----------|-------------|---------|---------------------|--------------------|
|                                         | n = 17178 | 78.85 %     | n = 4609 | 21.15 %     |         | OR                  | 95% CI             |
| Mortality (%)                           | 642       | 3.74 %      | 201      | 4.36 %      | 0.06    | 0.85                | (0.72 - 1.00)      |
| Length of Stay (days)                   | 5.67      | ± 6.16 days | 5.90     | ± 7.23 days | 0.73    |                     |                    |
| Hospital Charges (\$)                   | 56984     | ± 95225 \$  | 62658    | ± 117705 \$ | 0.16    |                     |                    |
| Disposition at Discharge                |           |             |          |             | < 0.001 | ***                 |                    |
| Routine (%)                             | 10569     | 61.50 %     | 3047     | 66.10 %     |         |                     |                    |
| Short-term Hospital (%)                 | 599       | 3.49 %      | 203      | 4.40 %      |         |                     |                    |
| SNF or Other Facility (%)               | 2541      | 14.80 %     | 487      | 10.60 %     |         |                     |                    |
| Home Health Care (%)                    | 2704      | 15.70 %     | 615      | 13.30 %     |         |                     |                    |
| Left AMA (%) †                          | 120       | 0.70 %      | 55       | 1.19 %      |         |                     |                    |
| Died (%)                                | 642       | 3.74 %      | 201      | 4.36 %      |         |                     |                    |
| Unknown (%)                             | 3         | 0.02 %      | 1        | 0.02 %      |         |                     |                    |
| <b>Liver Complications</b>              |           |             |          |             |         |                     |                    |
| Acute Liver Failure (%)                 | 736       | 4.28 %      | 242      | 5.25 %      | 0.006   | **                  | 0.81 (0.70 - 0.94) |
| Cirrhosis (%)                           | 6254      | 36.40 %     | 1919     | 41.60 %     | < 0.001 | ***                 | 0.80 (0.75 - 0.86) |
| Ascites (%) §                           | 2223      | 12.90 %     | 799      | 17.30 %     | < 0.001 | ***                 | 0.71 (0.65 - 0.77) |
| Cirrhosis-related (%)                   | 2148      | 12.50 %     | 777      | 16.90 %     | < 0.001 | ***                 | 0.70 (0.64 - 0.77) |
| ALF-related (%)                         | 216       | 1.26 %      | 82       | 1.78 %      | 0.008   | **                  | 0.70 (0.54 - 0.91) |
| Varices (%) §                           | 1583      | 9.22 %      | 576      | 12.50 %     | < 0.001 | ***                 | 0.71 (0.64 - 0.79) |
| Cirrhosis-related (%)                   | 1562      | 9.09 %      | 568      | 12.30 %     | < 0.001 | ***                 | 0.71 (0.64 - 0.79) |
| ALF-related (%)                         | 76        | 0.44 %      | 32       | 0.69 %      | 0.04    | *                   | 0.64 (0.42 - 0.96) |
| Variceal Bleeding (%) §                 | 320       | 1.86 %      | 123      | 2.67 %      | < 0.001 | ***                 | 0.69 (0.56 - 0.85) |
| Cirrhosis-related (%)                   | 320       | 1.86 %      | 122      | 2.65 %      | < 0.001 | ***                 | 0.70 (0.57 - 0.86) |
| ALF-related (%)                         | 5         | 0.03 %      | 6        | 0.13 %      | 0.02    | *                   | 0.22 (0.07 - 0.73) |
| Spontaneous Bacterial Peritonitis (%) § | 254       | 1.48 %      | 131      | 2.84 %      | < 0.001 | ***                 | 0.51 (0.41 - 0.64) |
| Cirrhosis-related (%)                   | 238       | 1.39 %      | 128      | 2.78 %      | < 0.001 | ***                 | 0.49 (0.40 - 0.61) |
| ALF-related (%)                         | 30        | 0.18 %      | 17       | 0.37 %      | 0.02    | *                   | 0.47 (0.26 - 0.86) |
| Hepatorenal Syndrome (%) §              | 277       | 1.61 %      | 110      | 2.39 %      | < 0.001 | ***                 | 0.67 (0.54 - 0.84) |
| Cirrhosis-related (%)                   | 239       | 1.39 %      | 97       | 2.10 %      | < 0.001 | ***                 | 0.66 (0.52 - 0.83) |
| ALF-related (%)                         | 77        | 0.45 %      | 28       | 0.61 %      | 0.21    |                     | 0.74 (0.48 - 1.14) |
| Encephalopathy (%) §                    | 1589      | 9.25 %      | 527      | 11.40 %     | < 0.001 | ***                 | 0.79 (0.71 - 0.88) |
| Cirrhosis-related (%)                   | 1522      | 8.86 %      | 506      | 11.00 %     | < 0.001 | ***                 | 0.79 (0.71 - 0.88) |
| ALF-related (%)                         | 141       | 0.82 %      | 44       | 0.96 %      | 0.43    |                     | 0.86 (0.61 - 1.21) |

\* p &lt; 0.05, \*\* p &lt; 0.01, \*\*\* p &lt; 0.001

† Left AMA: Left against medical advice

§ These variables include both cirrhosis and ALF-related events counting overlapping incidences

Supplementary Table 3b: Pre-Match Comparison of Hospital Outcomes in Patients Admitted with Autoimmune Hepatitis; Stratified by Race

| Hospital Outcomes                       | Black versus White |             |           |             |         |                                  | Hispanic versus White |             |           |             |         |                                  |                    |
|-----------------------------------------|--------------------|-------------|-----------|-------------|---------|----------------------------------|-----------------------|-------------|-----------|-------------|---------|----------------------------------|--------------------|
|                                         | Black              |             | White     |             | p-value | Univariate Analysis<br>OR 95% CI | Hispanic              |             | White     |             | p-value | Univariate Analysis<br>OR 95% CI |                    |
|                                         | n = 3688           | 19.81 %     | n = 14926 | 80.19 %     |         |                                  | n = 3173              | 17.53 %     | n = 14926 | 82.47 %     |         |                                  |                    |
| Mortality (%)                           | 142                | 3.85 %      | 559       | 3.75 %      | 0.80    | 1.03 (0.85 - 1.24)               | 142                   | 4.48 %      | 559       | 3.75 %      | 0.06    | 1.20 (1.00 - 1.45)               |                    |
| Length of Stay (days)                   | 6.40               | ± 7.41 days | 5.48      | ± 5.89 days | < 0.001 | ***                              | 6.00                  | ± 7.35 days | 5.48      | ± 5.89 days | 0.005   | **                               |                    |
| Hospital Charges (\$)                   | 62220              | ± 111728 \$ | 54201     | ± 91308 \$  | < 0.001 | ***                              | 72233                 | ± 123440 \$ | 54201     | ± 91308 \$  | < 0.001 | ***                              |                    |
| Disposition at Discharge                |                    |             |           |             | < 0.001 | ***                              |                       |             |           |             | < 0.001 | ***                              |                    |
| Routine (%)                             | 2456               | 66.60 %     | 8950      | 60.00 %     |         |                                  | 2210                  | 69.70 %     | 8950      | 60.00 %     |         |                                  |                    |
| Short-term Hospital (%)                 | 142                | 3.85 %      | 572       | 3.83 %      |         |                                  | 88                    | 2.77 %      | 572       | 3.83 %      |         |                                  |                    |
| SNF or other facility (%)               | 395                | 10.70 %     | 2359      | 15.80 %     |         |                                  | 274                   | 8.64 %      | 2359      | 15.80 %     |         |                                  |                    |
| Home Health Care (%)                    | 514                | 13.90 %     | 2375      | 15.90 %     |         |                                  | 430                   | 13.60 %     | 2375      | 15.90 %     |         |                                  |                    |
| Left AMA (%) ‡                          | 39                 | 1.06 %      | 108       | 0.72 %      |         |                                  | 28                    | 0.88 %      | 108       | 0.72 %      |         |                                  |                    |
| Died (%)                                | 142                | 3.85 %      | 559       | 3.75 %      |         |                                  | 142                   | 4.48 %      | 559       | 3.75 %      |         |                                  |                    |
| Unknown (%)                             | 0                  | 0.00 %      | 3         | 0.02 %      |         |                                  | 1                     | 0.03 %      | 3         | 0.02 %      |         |                                  |                    |
| <b>Liver Complications</b>              |                    |             |           |             |         |                                  |                       |             |           |             |         |                                  |                    |
| Acute Liver Failure (%)                 | 245                | 6.64 %      | 589       | 3.95 %      | < 0.001 | ***                              | 144                   | 4.54 %      | 589       | 3.95 %      | 0.14    | 1.16 (0.96 - 1.39)               |                    |
| Cirrhosis (%)                           | 1338               | 36.30 %     | 5266      | 35.30 %     | 0.26    | 1.04 (0.97 - 1.13)               | 1569                  | 49.40 %     | 5266      | 35.30 %     | < 0.001 | ***                              | 1.79 (1.66 - 1.94) |
| Ascites (%) §                           | 470                | 12.70 %     | 1948      | 13.10 %     | 0.64    | 0.97 (0.87 - 1.08)               | 604                   | 19.00 %     | 1948      | 13.10 %     | < 0.001 | ***                              | 1.57 (1.42 - 1.73) |
| Cirrhosis-related (%)                   | 444                | 12.00 %     | 1889      | 12.70 %     | 0.32    | 0.94 (0.85 - 1.05)               | 592                   | 18.70 %     | 1889      | 12.70 %     | < 0.001 | ***                              | 1.58 (1.43 - 1.75) |
| ALF-related (%)                         | 61                 | 1.65 %      | 185       | 1.24 %      | 0.06    | 1.34 (1.00 - 1.79)               | 52                    | 1.64 %      | 185       | 1.24 %      | 0.09    | 1.33 (0.97 - 1.81)               |                    |
| Varices (%) §                           | 348                | 9.44 %      | 1348      | 9.03 %      | 0.46    | 1.05 (0.93 - 1.19)               | 463                   | 14.60 %     | 1348      | 9.03 %      | < 0.001 | ***                              | 1.72 (1.54 - 1.93) |
| Cirrhosis-related (%)                   | 338                | 9.16 %      | 1332      | 8.92 %      | 0.67    | 1.03 (0.91 - 1.17)               | 460                   | 14.50 %     | 1332      | 8.92 %      | < 0.001 | ***                              | 1.73 (1.54 - 1.94) |
| ALF-related (%)                         | 28                 | 0.76 %      | 64        | 0.43 %      | 0.02    | * 1.78 (1.14 - 2.77)             | 16                    | 0.50 %      | 64        | 0.43 %      | 0.66    | 1.18 (0.68 - 2.04)               |                    |
| Variceal Bleeding (%) §                 | 57                 | 1.55 %      | 268       | 1.80 %      | 0.33    | 0.86 (0.64 - 1.15)               | 118                   | 3.72 %      | 268       | 1.80 %      | < 0.001 | ***                              | 2.11 (1.70 - 2.63) |
| Cirrhosis-related (%)                   | 57                 | 1.55 %      | 267       | 1.79 %      | 0.35    | 0.86 (0.65 - 1.15)               | 118                   | 3.72 %      | 267       | 1.79 %      | < 0.001 | ***                              | 2.12 (1.70 - 2.64) |
| ALF-related (%)                         | 5                  | 0.14 %      | 5         | 0.03 %      | 0.05    | * 4.05 (1.17 - 14.00)            | 1                     | 0.03 %      | 5         | 0.03 %      | 1.00 †  | 0.94 (0.02 - 8.41)               |                    |
| Spontaneous Bacterial Peritonitis (%) § | 67                 | 1.82 %      | 229       | 1.53 %      | 0.25    | 1.19 (0.90 - 1.56)               | 89                    | 2.80 %      | 229       | 1.53 %      | < 0.001 | ***                              | 1.85 (1.45 - 2.37) |
| Cirrhosis-related (%)                   | 61                 | 1.65 %      | 218       | 1.46 %      | 0.43    | 1.13 (0.85 - 1.51)               | 87                    | 2.74 %      | 218       | 1.46 %      | < 0.001 | ***                              | 1.90 (1.48 - 2.45) |
| ALF-related (%)                         | 10                 | 0.27 %      | 30        | 0.20 %      | 0.53    | 1.35 (0.66 - 2.76)               | 7                     | 0.22 %      | 30        | 0.20 %      | 1.00    | 1.10 (0.48 - 2.50)               |                    |
| Hepatorenal Syndrome (%) §              | 75                 | 2.03 %      | 232       | 1.55 %      | 0.05    | * 1.31 (1.01 - 1.71)             | 80                    | 2.52 %      | 232       | 1.55 %      | < 0.001 | ***                              | 1.64 (1.27 - 2.12) |
| Cirrhosis-related (%)                   | 57                 | 1.55 %      | 202       | 1.35 %      | 0.42    | 1.14 (0.85 - 1.54)               | 77                    | 2.43 %      | 202       | 1.35 %      | < 0.001 | ***                              | 1.81 (1.39 - 2.36) |
| ALF-related (%)                         | 33                 | 0.90 %      | 60        | 0.40 %      | < 0.001 | ***                              | 12                    | 0.38 %      | 60        | 0.40 %      | 0.97    | 0.94 (0.51 - 1.75)               |                    |
| Encephalopathy (%) §                    | 302                | 8.19 %      | 1359      | 9.10 %      | 0.09    | 0.89 (0.78 - 1.01)               | 455                   | 14.30 %     | 1359      | 9.10 %      | < 0.001 | ***                              | 1.67 (1.49 - 1.87) |
| Cirrhosis-related (%)                   | 273                | 7.40 %      | 1311      | 8.78 %      | 0.008   | ** 0.83 (0.72 - 0.95)            | 444                   | 14.00 %     | 1311      | 8.78 %      | < 0.001 | ***                              | 1.69 (1.51 - 1.90) |
| ALF-related (%)                         | 48                 | 1.30 %      | 108       | 0.72 %      | < 0.001 | ***                              | 29                    | 0.91 %      | 108       | 0.72 %      | 0.31    | 1.27 (0.84 - 1.91)               |                    |

\* p &lt; 0.05, \*\* p &lt; 0.01, \*\*\* p &lt; 0.001

† Fisher's Test

‡ Left AMA: Left against medical advice

§ These variables include both cirrhosis and ALF-related events counting overlapping incidences
