# Supplementary material
Source: PubMed Central journal article supplement (PMC9933617)
Supplement: flgastro-2022-102113supp004.pdf [file flgastro-2022-102113supp004.pdf]

Supplementary Table 4: Comparison of Hospital Outcomes in White Patients Admitted with Autoimmune Hepatitis; Male versus Female

| Hospital Outcomes                       | Pre-Match Comparison |             |          |             |         |                     | Post-Match Comparison |               |             |          |             |         |                     |        |               |               |
|-----------------------------------------|----------------------|-------------|----------|-------------|---------|---------------------|-----------------------|---------------|-------------|----------|-------------|---------|---------------------|--------|---------------|---------------|
|                                         | Female               |             | Male     |             | p-value | Univariate Analysis |                       | Female        |             | Male     |             | p-value | Univariate Analysis |        |               |               |
|                                         | n = 11579            | 77.58 %     | n = 3347 | 22.42 %     |         | OR                  | 95% CI                | n = 3347      | 50.00 %     | n = 3347 | 50.00 %     |         | OR                  | 95% CI |               |               |
| Mortality (%)                           | 421                  | 3.64 %      | 138      | 4.12 %      | 0.21    | 0.88                | (0.72 - 1.07)         | 106           | 3.17 %      | 138      | 4.12 %      | 0.04    | *                   | 0.76   | (0.59 - 0.98) |               |
| Length of Stay (days)                   | 5.45                 | ± 5.70 days | 5.61     | ± 6.50 days | 0.31    |                     |                       | 5.43          | ± 5.68 days | 5.61     | ± 6.50 days | 0.37    |                     |        |               |               |
| Hospital Charges (\$)                   | 52904                | ± 82699 \$  | 58687    | ± 116178 \$ | 0.42    |                     |                       | 49218         | ± 70351 \$  | 58687    | ± 116178 \$ | < 0.001 | ***                 |        |               |               |
| Disposition at Discharge                |                      |             |          |             | < 0.001 | ***                 |                       |               |             |          |             | 0.005   | **                  |        |               |               |
| Routine (%)                             | 6781                 | 58.60 %     | 2169     | 64.80 %     |         |                     |                       | 2121          | 63.40 %     | 2169     | 64.80 %     |         |                     |        |               |               |
| Short-term Hospital (%)                 | 422                  | 3.64 %      | 150      | 4.48 %      |         |                     |                       | 125           | 3.73 %      | 150      | 4.48 %      |         |                     |        |               |               |
| SNF or other facility (%)               | 1977                 | 17.10 %     | 382      | 11.40 %     |         |                     |                       | 457           | 13.70 %     | 382      | 11.40 %     |         |                     |        |               |               |
| Home Health Care (%)                    | 1905                 | 16.50 %     | 470      | 14.00 %     |         |                     |                       | 512           | 15.30 %     | 470      | 14.00 %     |         |                     |        |               |               |
| Left AMA (%) ‡                          | 71                   | 0.61 %      | 37       | 1.11 %      |         |                     |                       | 26            | 0.78 %      | 37       | 1.11 %      |         |                     |        |               |               |
| Died (%)                                | 421                  | 3.64 %      | 138      | 4.12 %      |         |                     |                       | 106           | 3.17 %      | 138      | 4.12 %      |         |                     |        |               |               |
| Unknown (%)                             | 2                    | 0.02 %      | 1        | 0.03 %      |         |                     |                       | 0             | 0.00 %      | 1        | 0.03 %      |         |                     |        |               |               |
| <b>Liver Complications</b>              |                      |             |          |             |         |                     |                       |               |             |          |             |         |                     |        |               |               |
| Acute Liver Failure (%)                 | 431                  | 3.72 %      | 158      | 4.72 %      | 0.01    | *                   | 0.78                  | (0.65 - 0.94) | 125         | 3.73 %   | 158         | 4.72 %  | 0.05                |        | 0.78          | (0.62 - 1.00) |
| Cirrhosis (%)                           | 3912                 | 33.80 %     | 1354     | 40.50 %     | < 0.001 | ***                 | 0.75                  | (0.69 - 0.81) | 1118        | 33.40 %  | 1354        | 40.50 % | < 0.001             | ***    | 0.74          | (0.67 - 0.82) |
| Ascites (%) §                           | 1388                 | 12.00 %     | 560      | 16.70 %     | < 0.001 | ***                 | 0.68                  | (0.61 - 0.75) | 413         | 12.30 %  | 560         | 16.70 % | < 0.001             | ***    | 0.70          | (0.61 - 0.80) |
| Cirrhosis-related (%)                   | 1341                 | 11.60 %     | 548      | 16.40 %     | < 0.001 | ***                 | 0.67                  | (0.60 - 0.75) | 399         | 11.90 %  | 548         | 16.40 % | < 0.001             | ***    | 0.69          | (0.60 - 0.79) |
| ALF-related (%)                         | 130                  | 1.12 %      | 55       | 1.64 %      | 0.02    | *                   | 0.68                  | (0.49 - 0.93) | 34          | 1.02 %   | 55          | 1.64 %  | 0.03                | *      | 0.61          | (0.40 - 0.94) |
| Varices (%) §                           | 945                  | 8.16 %      | 403      | 12.00 %     | < 0.001 | ***                 | 0.65                  | (0.57 - 0.73) | 275         | 8.22 %   | 403         | 12.00 % | < 0.001             | ***    | 0.65          | (0.56 - 0.77) |
| Cirrhosis-related (%)                   | 935                  | 8.07 %      | 397      | 11.90 %     | < 0.001 | ***                 | 0.65                  | (0.58 - 0.74) | 273         | 8.16 %   | 397         | 11.90 % | < 0.001             | ***    | 0.66          | (0.56 - 0.78) |
| ALF-related (%)                         | 39                   | 0.34 %      | 25       | 0.75 %      | 0.002   | **                  | 0.45                  | (0.27 - 0.74) | 9           | 0.27 %   | 25          | 0.75 %  | 0.010               | **     | 0.36          | (0.17 - 0.77) |
| Variceal Bleeding (%) §                 | 181                  | 1.56 %      | 87       | 2.60 %      | < 0.001 | ***                 | 0.60                  | (0.46 - 0.77) | 56          | 1.67 %   | 87          | 2.60 %  | 0.01                | *      | 0.64          | (0.45 - 0.90) |
| Cirrhosis-related (%)                   | 181                  | 1.56 %      | 86       | 2.57 %      | < 0.001 | ***                 | 0.60                  | (0.46 - 0.78) | 56          | 1.67 %   | 86          | 2.57 %  | 0.01                | *      | 0.65          | (0.46 - 0.91) |
| ALF-related (%)                         | 3                    | 0.03 %      | 2        | 0.06 %      | 0.31    | †                   | 0.43                  | (0.05 - 5.19) | 0           | 0.00 %   | 2           | 0.06 %  | 0.50                | †      | 0.00          | (0.00 - 5.32) |
| Spontaneous Bacterial Peritonitis (%) § | 147                  | 1.27 %      | 82       | 2.45 %      | < 0.001 | ***                 | 0.51                  | (0.39 - 0.67) | 49          | 1.46 %   | 82          | 2.45 %  | 0.005               | **     | 0.59          | (0.41 - 0.85) |
| Cirrhosis-related (%)                   | 139                  | 1.20 %      | 79       | 2.36 %      | < 0.001 | ***                 | 0.50                  | (0.38 - 0.66) | 47          | 1.40 %   | 79          | 2.36 %  | 0.005               | **     | 0.59          | (0.41 - 0.85) |
| ALF-related (%)                         | 18                   | 0.16 %      | 12       | 0.36 %      | 0.04    | *                   | 0.43                  | (0.21 - 0.90) | 5           | 0.15 %   | 12          | 0.36 %  | 0.15                |        | 0.42          | (0.15 - 1.18) |
| Hepatorenal Syndrome (%) §              | 166                  | 1.43 %      | 66       | 1.97 %      | 0.03    | *                   | 0.72                  | (0.54 - 0.96) | 40          | 1.20 %   | 66          | 1.97 %  | 0.01                | *      | 0.60          | (0.40 - 0.89) |
| Cirrhosis-related (%)                   | 143                  | 1.23 %      | 59       | 1.76 %      | 0.03    | *                   | 0.70                  | (0.51 - 0.95) | 36          | 1.08 %   | 59          | 1.76 %  | 0.02                | *      | 0.61          | (0.40 - 0.92) |
| ALF-related (%)                         | 46                   | 0.40 %      | 14       | 0.42 %      | 0.99    |                     | 0.95                  | (0.52 - 1.73) | 7           | 0.21 %   | 14          | 0.42 %  | 0.19                |        | 0.50          | (0.20 - 1.24) |
| Encephalopathy (%) §                    | 989                  | 8.54 %      | 370      | 11.10 %     | < 0.001 | ***                 | 0.75                  | (0.66 - 0.85) | 311         | 9.29 %   | 370         | 11.10 % | 0.02                | *      | 0.82          | (0.70 - 0.97) |
| Cirrhosis-related (%)                   | 954                  | 8.24 %      | 357      | 10.70 %     | < 0.001 | ***                 | 0.75                  | (0.66 - 0.85) | 298         | 8.90 %   | 357         | 10.70 % | 0.02                | *      | 0.82          | (0.70 - 0.96) |
| ALF-related (%)                         | 82                   | 0.71 %      | 26       | 0.78 %      | 0.77    |                     | 0.91                  | (0.59 - 1.42) | 30          | 0.90 %   | 26          | 0.78 %  | 0.69                |        | 1.16          | (0.68 - 1.96) |

\* p &lt; 0.05, \*\* p &lt; 0.01, \*\*\* p &lt; 0.001

† Fisher's Test

‡ Left AMA: Left against medical advice

§ These variables include both cirrhosis and ALF-related events counting overlapping incidences
