# Supplementary material
Source: PubMed Central journal article supplement (PMC9933617)
Supplement: flgastro-2022-102113supp005.pdf [file flgastro-2022-102113supp005.pdf]

Supplementary Table 5: Comparison of Hospital Outcomes in Black Patients Admitted with Autoimmune Hepatitis; Male versus Female

| Hospital Outcomes                       | Pre-Match Comparison |             |         |             |         |                     | Post-Match Comparison |         |             |         |             |         |                     |                      |
|-----------------------------------------|----------------------|-------------|---------|-------------|---------|---------------------|-----------------------|---------|-------------|---------|-------------|---------|---------------------|----------------------|
|                                         | Female               |             | Male    |             | p-value | Univariate Analysis |                       | Female  |             | Male    |             | p-value | Univariate Analysis |                      |
|                                         | n = 2981             | 80.83 %     | n = 707 | 19.17 %     |         | OR                  | 95% CI                | n = 707 | 50.00 %     | n = 707 | 50.00 %     |         | OR                  | 95% CI               |
| Mortality (%)                           | 114                  | 3.82 %      | 28      | 3.96 %      | 0.95    | 0.96                | (0.63 - 1.47)         | 25      | 3.54 %      | 28      | 3.96 %      | 0.78    | 0.89                | (0.51 - 1.54)        |
| Length of Stay (days)                   | 6.37                 | ± 7.20 days | 6.54    | ± 8.23 days | 0.58    |                     |                       | 6.27    | ± 6.31 days | 6.54    | ± 8.23 days | 0.42    |                     |                      |
| Hospital Charges (\$)                   | 61167                | ± 108551 \$ | 66658   | ± 124217 \$ | 0.81    |                     |                       | 57635   | ± 101065 \$ | 66658   | ± 124217 \$ | 0.75    |                     |                      |
| Disposition at Discharge                |                      |             |         |             | 0.05    | *                   |                       |         |             |         |             | 0.51    | *                   |                      |
| Routine (%)                             | 1969                 | 66.10 %     | 487     | 68.90 %     |         |                     |                       | 495     | 70.00 %     | 487     | 68.90 %     |         |                     |                      |
| Short-term Hospital (%)                 | 110                  | 3.69 %      | 32      | 4.53 %      |         |                     |                       | 24      | 3.39 %      | 32      | 4.53 %      |         |                     |                      |
| SNF or other facility (%)               | 324                  | 10.90 %     | 71      | 10.00 %     |         |                     |                       | 62      | 8.77 %      | 71      | 10.00 %     |         |                     |                      |
| Home Health Care (%)                    | 437                  | 14.70 %     | 77      | 10.90 %     |         |                     |                       | 93      | 13.20 %     | 77      | 10.90 %     |         |                     |                      |
| Left AMA (%) ‡                          | 27                   | 0.91 %      | 12      | 1.70 %      |         |                     |                       | 8       | 1.13 %      | 12      | 1.70 %      |         |                     |                      |
| Died (%)                                | 114                  | 3.82 %      | 28      | 3.96 %      |         |                     |                       | 25      | 3.54 %      | 28      | 3.96 %      |         |                     |                      |
| Unknown (%)                             | 0                    | 0.00 %      | 0       | 0.00 %      |         |                     |                       | 0       | 0.00 %      | 0       | 0.00 %      |         |                     |                      |
| <b>Liver Complications</b>              |                      |             |         |             |         |                     |                       |         |             |         |             |         |                     |                      |
| Acute Liver Failure (%)                 | 196                  | 6.57 %      | 49      | 6.93 %      | 0.80    | 0.95                | (0.68 - 1.31)         | 46      | 6.51 %      | 49      | 6.93 %      | 0.83    | 0.93                | (0.62 - 1.42)        |
| Cirrhosis (%)                           | 1048                 | 35.20 %     | 290     | 41.00 %     | 0.004   | **                  | 0.78 (0.66 - 0.92)    | 264     | 37.30 %     | 290     | 41.00 %     | 0.17    | 0.86                | (0.69 - 1.06)        |
| Ascites (%) §                           | 348                  | 11.70 %     | 122     | 17.30 %     | < 0.001 | ***                 | 0.63 (0.51 - 0.79)    | 86      | 12.20 %     | 122     | 17.30 %     | 0.009   | **                  | 0.66 (0.49 - 0.89)   |
| Cirrhosis-related (%)                   | 330                  | 11.10 %     | 114     | 16.10 %     | < 0.001 | ***                 | 0.65 (0.51 - 0.82)    | 84      | 11.90 %     | 114     | 16.10 %     | 0.03    | *                   | 0.70 (0.52 - 0.95)   |
| ALF-related (%)                         | 46                   | 1.54 %      | 15      | 2.12 %      | 0.36    |                     | 0.72 (0.40 - 1.30)    | 10      | 1.41 %      | 15      | 2.12 %      | 0.42    |                     | 0.66 (0.30 - 1.48)   |
| Varices (%) §                           | 249                  | 8.35 %      | 99      | 14.00 %     | < 0.001 | ***                 | 0.56 (0.44 - 0.72)    | 68      | 9.62 %      | 99      | 14.00 %     | 0.01    | *                   | 0.65 (0.47 - 0.91)   |
| Cirrhosis-related (%)                   | 241                  | 8.08 %      | 97      | 13.70 %     | < 0.001 | ***                 | 0.55 (0.43 - 0.71)    | 68      | 9.62 %      | 97      | 13.70 %     | 0.02    | *                   | 0.67 (0.48 - 0.93)   |
| ALF-related (%)                         | 22                   | 0.74 %      | 6       | 0.85 %      | 0.95    |                     | 0.87 (0.35 - 2.15)    | 3       | 0.42 %      | 6       | 0.85 %      | 0.51    | †                   | 0.50 (0.08 - 2.34)   |
| Variceal Bleeding (%) §                 | 39                   | 1.31 %      | 18      | 2.55 %      | 0.03    | *                   | 0.51 (0.29 - 0.89)    | 11      | 1.56 %      | 18      | 2.55 %      | 0.26    |                     | 0.60 (0.28 - 1.29)   |
| Cirrhosis-related (%)                   | 39                   | 1.31 %      | 18      | 2.55 %      | 0.03    | *                   | 0.51 (0.29 - 0.89)    | 11      | 1.56 %      | 18      | 2.55 %      | 0.26    |                     | 0.60 (0.28 - 1.29)   |
| ALF-related (%)                         | 2                    | 0.07 %      | 3       | 0.42 %      | 0.05    | †                   | 0.16 (0.01 - 1.38)    | 1       | 0.14 %      | 3       | 0.42 %      | 0.62    | †                   | 0.33 (0.01 - 4.15)   |
| Spontaneous Bacterial Peritonitis (%) § | 45                   | 1.51 %      | 22      | 3.11 %      | 0.007   | **                  | 0.48 (0.28 - 0.80)    | 8       | 1.13 %      | 22      | 3.11 %      | 0.02    | *                   | 0.36 (0.16 - 0.81)   |
| Cirrhosis-related (%)                   | 39                   | 1.31 %      | 22      | 3.11 %      | 0.001   | **                  | 0.41 (0.24 - 0.70)    | 8       | 1.13 %      | 22      | 3.11 %      | 0.02    | *                   | 0.36 (0.16 - 0.81)   |
| ALF-related (%)                         | 9                    | 0.30 %      | 1       | 0.14 %      | 0.70    | †                   | 2.14 (0.30 - 93.81)   | 3       | 0.42 %      | 1       | 0.14 %      | 0.62    | †                   | 3.01 (0.24 - 158.03) |
| Hepatorenal Syndrome (%) §              | 52                   | 1.74 %      | 23      | 3.25 %      | 0.02    | *                   | 0.53 (0.32 - 0.87)    | 13      | 1.84 %      | 23      | 3.25 %      | 0.13    |                     | 0.56 (0.28 - 1.11)   |
| Cirrhosis-related (%)                   | 40                   | 1.34 %      | 17      | 2.40 %      | 0.06    |                     | 0.55 (0.31 - 0.98)    | 12      | 1.70 %      | 17      | 2.40 %      | 0.45    |                     | 0.70 (0.33 - 1.48)   |
| ALF-related (%)                         | 22                   | 0.74 %      | 11      | 1.56 %      | 0.06    |                     | 0.47 (0.23 - 0.97)    | 5       | 0.71 %      | 11      | 1.56 %      | 0.21    |                     | 0.45 (0.16 - 1.30)   |
| Encephalopathy (%) §                    | 228                  | 7.65 %      | 74      | 10.50 %     | 0.02    | *                   | 0.71 (0.54 - 0.93)    | 55      | 7.78 %      | 74      | 10.50 %     | 0.10    |                     | 0.72 (0.50 - 1.04)   |
| Cirrhosis-related (%)                   | 205                  | 6.88 %      | 68      | 9.62 %      | 0.02    | *                   | 0.69 (0.52 - 0.93)    | 51      | 7.21 %      | 68      | 9.62 %      | 0.13    |                     | 0.73 (0.50 - 1.07)   |
| ALF-related (%)                         | 39                   | 1.31 %      | 9       | 1.27 %      | 1.00    |                     | 1.03 (0.50 - 2.13)    | 10      | 1.41 %      | 9       | 1.27 %      | 1.00    |                     | 1.11 (0.45 - 2.76)   |

\* p &lt; 0.05, \*\* p &lt; 0.01, \*\*\* p &lt; 0.001

† Fisher's Test

‡ Left AMA: Left against medical advice

§ These variables include both cirrhosis and ALF-related events counting overlapping incidences
