# Supplementary material
Source: PubMed Central journal article supplement (PMC9933617)
Supplement: flgastro-2022-102113supp006.pdf [file flgastro-2022-102113supp006.pdf]

Supplementary Table 6: Comparison of Hospital Outcomes in Hispanic Patients Admitted with Autoimmune Hepatitis; Male versus Female

| Hospital Outcomes                       | Pre-Match Comparison |             |         |             |             |                                  | Post-Match Comparison |             |         |             |             |                                  |
|-----------------------------------------|----------------------|-------------|---------|-------------|-------------|----------------------------------|-----------------------|-------------|---------|-------------|-------------|----------------------------------|
|                                         | Female               |             | Male    |             | p-value     | Univariate Analysis<br>OR 95% CI | Female                |             | Male    |             | p-value     | Univariate Analysis<br>OR 95% CI |
|                                         | n = 2618             | 82.51 %     | n = 555 | 17.49 %     |             |                                  | n = 555               | 50.00 %     | n = 555 | 50.00 %     |             |                                  |
| Mortality (%)                           | 107                  | 4.09 %      | 35      | 6.31 %      | 0.03 *      | 0.63 (0.43 - 0.94)               | 13                    | 2.34 %      | 35      | 6.31 %      | 0.002 **    | 0.36 (0.19 - 0.68)               |
| Length of Stay (days)                   | 5.83                 | ± 6.78 days | 6.82    | ± 9.57 days | 0.007 **    |                                  | 5.56                  | ± 6.75 days | 6.82    | ± 9.57 days | 0.004 **    |                                  |
| Hospital Charges (\$)                   | 70266                | ± 124786 \$ | 81508   | ± 116542 \$ | < 0.001 *** |                                  | 61305                 | ± 113772 \$ | 81508   | ± 116542 \$ | < 0.001 *** |                                  |
| Disposition at Discharge                |                      |             |         |             | 0.03 *      |                                  |                       |             |         |             | 0.003 **    |                                  |
| Routine (%)                             | 1819                 | 69.50 %     | 391     | 70.50 %     |             |                                  | 430                   | 77.50 %     | 391     | 70.50 %     |             |                                  |
| Short-term Hospital (%)                 | 67                   | 2.56 %      | 21      | 3.78 %      |             |                                  | 9                     | 1.62 %      | 21      | 3.78 %      |             |                                  |
| SNF or other facility (%)               | 240                  | 9.17 %      | 34      | 6.13 %      |             |                                  | 29                    | 5.23 %      | 34      | 6.13 %      |             |                                  |
| Home Health Care (%)                    | 362                  | 13.80 %     | 68      | 12.30 %     |             |                                  | 64                    | 11.50 %     | 68      | 12.30 %     |             |                                  |
| Left AMA (%) ‡                          | 22                   | 0.84 %      | 6       | 1.08 %      |             |                                  | 10                    | 1.80 %      | 6       | 1.08 %      |             |                                  |
| Died (%)                                | 107                  | 4.09 %      | 35      | 6.31 %      |             |                                  | 13                    | 2.34 %      | 35      | 6.31 %      |             |                                  |
| Unknown (%)                             | 1                    | 0.04 %      | 0       | 0.00 %      |             |                                  | 0                     | 0.00 %      | 0       | 0.00 %      |             |                                  |
| <b>Liver Complications</b>              |                      |             |         |             |             |                                  |                       |             |         |             |             |                                  |
| Acute Liver Failure (%)                 | 109                  | 4.16 %      | 35      | 6.31 %      | 0.04 *      | 0.65 (0.44 - 0.96)               | 19                    | 3.42 %      | 35      | 6.31 %      | 0.04 *      | 0.53 (0.30 - 0.93)               |
| Cirrhosis (%)                           | 1294                 | 49.40 %     | 275     | 49.50 %     | 1.00        | 1.00 (0.83 - 1.20)               | 249                   | 44.90 %     | 275     | 49.50 %     | 0.13        | 0.83 (0.65 - 1.05)               |
| Ascites (%) §                           | 487                  | 18.60 %     | 117     | 21.10 %     | 0.20        | 0.86 (0.68 - 1.07)               | 100                   | 18.00 %     | 117     | 21.10 %     | 0.23        | 0.82 (0.61 - 1.11)               |
| Cirrhosis-related (%)                   | 477                  | 18.20 %     | 115     | 20.70 %     | 0.19        | 0.85 (0.68 - 1.07)               | 98                    | 17.70 %     | 115     | 20.70 %     | 0.22        | 0.82 (0.61 - 1.11)               |
| ALF-related (%)                         | 40                   | 1.53 %      | 12      | 2.16 %      | 0.38        | 0.70 (0.37 - 1.35)               | 8                     | 1.44 %      | 12      | 2.16 %      | 0.50        | 0.66 (0.27 - 1.63)               |
| Varices (%) §                           | 389                  | 14.90 %     | 74      | 13.30 %     | 0.39        | 1.13 (0.87 - 1.48)               | 85                    | 15.30 %     | 74      | 13.30 %     | 0.39        | 1.18 (0.84 - 1.65)               |
| Cirrhosis-related (%)                   | 386                  | 14.70 %     | 74      | 13.30 %     | 0.43        | 1.12 (0.86 - 1.47)               | 84                    | 15.10 %     | 74      | 13.30 %     | 0.44        | 1.16 (0.83 - 1.62)               |
| ALF-related (%)                         | 15                   | 0.57 %      | 1       | 0.18 %      | 0.33 †      | 3.19 (0.49 - 134.57)             | 3                     | 0.54 %      | 1       | 0.18 %      | 0.62 †      | 3.01 (0.24 - 158.21)             |
| Variceal Bleeding (%) §                 | 100                  | 3.82 %      | 18      | 3.24 %      | 0.60        | 1.18 (0.71 - 1.97)               | 20                    | 3.60 %      | 18      | 3.24 %      | 0.87        | 1.12 (0.58 - 2.13)               |
| Cirrhosis-related (%)                   | 100                  | 3.82 %      | 18      | 3.24 %      | 0.60        | 1.18 (0.71 - 1.97)               | 20                    | 3.60 %      | 18      | 3.24 %      | 0.87        | 1.12 (0.58 - 2.13)               |
| ALF-related (%)                         | 0                    | 0.00 %      | 1       | 0.18 %      | 0.17 †      | 0.00 (0.00 - 8.27)               | 0                     | 0.00 %      | 1       | 0.18 %      | 1.00 †      | 0.00 (0.00 - 39.00)              |
| Spontaneous Bacterial Peritonitis (%) § | 62                   | 2.37 %      | 27      | 4.86 %      | 0.002 **    | 0.47 (0.30 - 0.75)               | 11                    | 1.98 %      | 27      | 4.86 %      | 0.01 *      | 0.40 (0.19 - 0.81)               |
| Cirrhosis-related (%)                   | 60                   | 2.29 %      | 27      | 4.86 %      | 0.001 **    | 0.46 (0.29 - 0.73)               | 11                    | 1.98 %      | 27      | 4.86 %      | 0.01 *      | 0.40 (0.19 - 0.81)               |
| ALF-related (%)                         | 3                    | 0.11 %      | 4       | 0.72 %      | 0.02 † *    | 0.16 (0.02 - 0.94)               | 0                     | 0.00 %      | 4       | 0.72 %      | 0.12 †      | 0.00 (0.00 - 1.51)               |
| Hepatorenal Syndrome (%) §              | 59                   | 2.25 %      | 21      | 3.78 %      | 0.05        | 0.59 (0.35 - 0.97)               | 13                    | 2.34 %      | 21      | 3.78 %      | 0.22        | 0.61 (0.30 - 1.23)               |
| Cirrhosis-related (%)                   | 56                   | 2.14 %      | 21      | 3.78 %      | 0.03 *      | 0.56 (0.33 - 0.93)               | 12                    | 2.16 %      | 21      | 3.78 %      | 0.16        | 0.56 (0.27 - 1.15)               |
| ALF-related (%)                         | 9                    | 0.34 %      | 3       | 0.54 %      | 0.45 †      | 0.63 (0.16 - 3.66)               | 3                     | 0.54 %      | 3       | 0.54 %      | 1.00 †      | 1.00 (0.13 - 7.50)               |
| Encephalopathy (%) §                    | 372                  | 14.20 %     | 83      | 15.00 %     | 0.70        | 0.94 (0.73 - 1.22)               | 61                    | 11.00 %     | 83      | 15.00 %     | 0.06        | 0.70 (0.49 - 1.00)               |
| Cirrhosis-related (%)                   | 363                  | 13.90 %     | 81      | 14.60 %     | 0.70        | 0.94 (0.73 - 1.22)               | 57                    | 10.30 %     | 81      | 14.60 %     | 0.04 *      | 0.67 (0.47 - 0.96)               |
| ALF-related (%)                         | 20                   | 0.76 %      | 9       | 1.62 %      | 0.09        | 0.47 (0.21 - 1.03)               | 6                     | 1.08 %      | 9       | 1.62 %      | 0.60        | 0.66 (0.23 - 1.88)               |

\* p &lt; 0.05, \*\* p &lt; 0.01, \*\*\* p &lt; 0.001

† Fisher's Test

‡ Left AMA: Left against medical advice

§ These variables include both cirrhosis and ALF-related events counting overlapping incidences
