# Supplementary material
Source: PubMed Central journal article supplement (PMC9933617)
Supplement: flgastro-2022-102113supp007.pdf [file flgastro-2022-102113supp007.pdf]

Supplementary Table 7: Comparison of Hospital Outcomes in Patients Admitted with Autoimmune Hepatitis; Black versus Hispanic

| Hospital Outcomes                       | Pre-Match Comparison |             |          |             |         |                     | Post-Match Comparison |               |             |          |             |         |                     |               |      |               |
|-----------------------------------------|----------------------|-------------|----------|-------------|---------|---------------------|-----------------------|---------------|-------------|----------|-------------|---------|---------------------|---------------|------|---------------|
|                                         | Female               |             | Male     |             | p-value | Univariate Analysis |                       | Female        |             | Male     |             | p-value | Univariate Analysis |               |      |               |
|                                         | n = 3173             | 46.25 %     | n = 3688 | 53.75 %     |         | OR                  | 95% CI                | n = 3173      | 50.00 %     | n = 3173 | 50.00 %     |         | OR                  | 95% CI        |      |               |
| Mortality (%)                           | 142                  | 4.48 %      | 142      | 3.85 %      | 0.22    | 1.17                | (0.92 - 1.48)         | 142           | 4.48 %      | 126      | 3.97 %      | 0.35    | 1.13                | (0.89 - 1.45) |      |               |
| Length of Stay (days)                   | 6.00                 | ± 7.35 days | 6.40     | ± 7.41 days | 0.007   | **                  |                       | 6.00          | ± 7.35 days | 6.43     | ± 7.59 days | 0.02    | *                   |               |      |               |
| Hospital Charges (\$)                   | 72233                | ± 123440 \$ | 62220    | ± 111728 \$ | < 0.001 | ***                 |                       | 72233         | ± 123440 \$ | 62774    | ± 115001 \$ | < 0.001 | ***                 |               |      |               |
| Disposition at Discharge                |                      |             |          |             | 0.004   | **                  |                       |               |             |          |             | < 0.001 | ***                 |               |      |               |
| Routine (%)                             | 2210                 | 69.70 %     | 2456     | 66.60 %     |         |                     |                       | 2210          | 69.70 %     | 2085     | 65.70 %     |         |                     |               |      |               |
| Short-term Hospital (%)                 | 88                   | 2.77 %      | 142      | 3.85 %      |         |                     |                       | 88            | 2.77 %      | 126      | 3.97 %      |         |                     |               |      |               |
| SNF or other facility (%)               | 274                  | 8.64 %      | 395      | 10.70 %     |         |                     |                       | 274           | 8.64 %      | 358      | 11.30 %     |         |                     |               |      |               |
| Home Health Care (%)                    | 430                  | 13.60 %     | 514      | 13.90 %     |         |                     |                       | 430           | 13.60 %     | 447      | 14.10 %     |         |                     |               |      |               |
| Left AMA (%) ‡                          | 28                   | 0.88 %      | 39       | 1.06 %      |         |                     |                       | 28            | 0.88 %      | 31       | 0.98 %      |         |                     |               |      |               |
| Died (%)                                | 142                  | 4.48 %      | 142      | 3.85 %      |         |                     |                       | 142           | 4.48 %      | 126      | 3.97 %      |         |                     |               |      |               |
| Unknown (%)                             | 1                    | 0.03 %      | 0        | 0.00 %      |         |                     |                       | 1             | 0.03 %      | 0        | 0.00 %      |         |                     |               |      |               |
| <b>Liver Complications</b>              |                      |             |          |             |         |                     |                       |               |             |          |             |         |                     |               |      |               |
| Acute Liver Failure (%)                 | 144                  | 4.54 %      | 245      | 6.64 %      | < 0.001 | ***                 | 0.67                  | (0.54 - 0.83) | 144         | 4.54 %   | 214         | 6.74 %  | < 0.001             | ***           | 0.66 | (0.53 - 0.82) |
| Cirrhosis (%)                           | 1569                 | 49.40 %     | 1338     | 36.30 %     | < 0.001 | ***                 | 1.72                  | (1.56 - 1.89) | 1569        | 49.40 %  | 1168        | 36.80 % | < 0.001             | ***           | 1.68 | (1.52 - 1.86) |
| Ascites (%) §                           | 604                  | 19.00 %     | 470      | 12.70 %     | < 0.001 | ***                 | 1.61                  | (1.41 - 1.84) | 604         | 19.00 %  | 410         | 12.90 % | < 0.001             | ***           | 1.58 | (1.38 - 1.82) |
| Cirrhosis-related (%)                   | 592                  | 18.70 %     | 444      | 12.00 %     | < 0.001 | ***                 | 1.68                  | (1.47 - 1.92) | 592         | 18.70 %  | 387         | 12.20 % | < 0.001             | ***           | 1.65 | (1.44 - 1.90) |
| ALF-related (%)                         | 52                   | 1.64 %      | 61       | 1.65 %      | 1.00    |                     | 0.99                  | (0.68 - 1.44) | 52          | 1.64 %   | 55          | 1.73 %  | 0.85                |               | 0.94 | (0.64 - 1.38) |
| Varices (%) §                           | 463                  | 14.60 %     | 348      | 9.44 %      | < 0.001 | ***                 | 1.64                  | (1.41 - 1.90) | 463         | 14.60 %  | 313         | 9.86 %  | < 0.001             | ***           | 1.56 | (1.34 - 1.82) |
| Cirrhosis-related (%)                   | 460                  | 14.50 %     | 338      | 9.16 %      | < 0.001 | ***                 | 1.68                  | (1.45 - 1.95) | 460         | 14.50 %  | 303         | 9.55 %  | < 0.001             | ***           | 1.61 | (1.38 - 1.87) |
| ALF-related (%)                         | 16                   | 0.50 %      | 28       | 0.76 %      | 0.24    |                     | 0.66                  | (0.36 - 1.23) | 16          | 0.50 %   | 26          | 0.82 %  | 0.16                |               | 0.61 | (0.33 - 1.15) |
| Variceal Bleeding (%) §                 | 118                  | 3.72 %      | 57       | 1.55 %      | < 0.001 | ***                 | 2.46                  | (1.79 - 3.39) | 118         | 3.72 %   | 54          | 1.70 %  | < 0.001             | ***           | 2.23 | (1.61 - 3.09) |
| Cirrhosis-related (%)                   | 118                  | 3.72 %      | 57       | 1.55 %      | < 0.001 | ***                 | 2.46                  | (1.79 - 3.39) | 118         | 3.72 %   | 54          | 1.70 %  | < 0.001             | ***           | 2.23 | (1.61 - 3.09) |
| ALF-related (%)                         | 1                    | 0.03 %      | 5        | 0.14 %      | 0.23 †  |                     | 0.23                  | (0.00 - 2.08) | 1           | 0.03 %   | 5           | 0.16 %  | 0.22 †              |               | 0.20 | (0.00 - 1.79) |
| Spontaneous Bacterial Peritonitis (%) § | 89                   | 2.80 %      | 67       | 1.82 %      | 0.008   | **                  | 1.56                  | (1.13 - 2.15) | 89          | 2.80 %   | 61          | 1.92 %  | 0.03                | *             | 1.47 | (1.06 - 2.05) |
| Cirrhosis-related (%)                   | 87                   | 2.74 %      | 61       | 1.65 %      | 0.003   | **                  | 1.68                  | (1.20 - 2.33) | 87          | 2.74 %   | 56          | 1.76 %  | 0.01                | *             | 1.57 | (1.12 - 2.20) |
| ALF-related (%)                         | 7                    | 0.22 %      | 10       | 0.27 %      | 0.86    |                     | 0.81                  | (0.31 - 2.14) | 7           | 0.22 %   | 8           | 0.25 %  | 1.00                |               | 0.87 | (0.32 - 2.42) |
| Hepatorenal Syndrome (%) §              | 80                   | 2.52 %      | 75       | 2.03 %      | 0.20    |                     | 1.25                  | (0.91 - 1.71) | 80          | 2.52 %   | 61          | 1.92 %  | 0.13                |               | 1.32 | (0.94 - 1.85) |
| Cirrhosis-related (%)                   | 77                   | 2.43 %      | 57       | 1.55 %      | 0.01    | *                   | 1.58                  | (1.12 - 2.24) | 77          | 2.43 %   | 46          | 1.45 %  | 0.006               | **            | 1.69 | (1.17 - 2.44) |
| ALF-related (%)                         | 12                   | 0.38 %      | 33       | 0.90 %      | 0.01    | *                   | 0.42                  | (0.22 - 0.82) | 12          | 0.38 %   | 27          | 0.85 %  | 0.03                | *             | 0.44 | (0.22 - 0.87) |
| Encephalopathy (%) §                    | 455                  | 14.30 %     | 302      | 8.19 %      | < 0.001 | ***                 | 1.88                  | (1.61 - 2.19) | 455         | 14.30 %  | 273         | 8.60 %  | < 0.001             | ***           | 1.78 | (1.52 - 2.08) |
| Cirrhosis-related (%)                   | 444                  | 14.00 %     | 273      | 7.40 %      | < 0.001 | ***                 | 2.04                  | (1.74 - 2.39) | 444         | 14.00 %  | 248         | 7.82 %  | < 0.001             | ***           | 1.92 | (1.63 - 2.26) |
| ALF-related (%)                         | 29                   | 0.91 %      | 48       | 1.30 %      | 0.16    |                     | 0.70                  | (0.44 - 1.11) | 29          | 0.91 %   | 43          | 1.36 %  | 0.12                |               | 0.67 | (0.42 - 1.08) |

\* p &lt; 0.05, \*\* p &lt; 0.01, \*\*\* p &lt; 0.001

† Fisher's Test

‡ Left AMA: Left against medical advice

§ These variables include both cirrhosis and ALF-related events counting overlapping incidences
